# Supplementary material
Source: PubMed Central journal article supplement (PMC4425404)

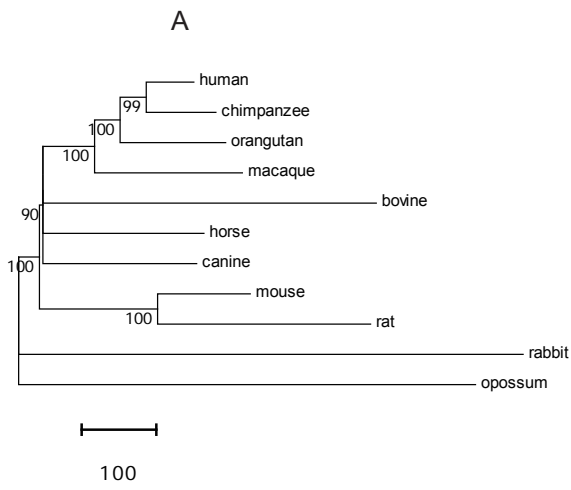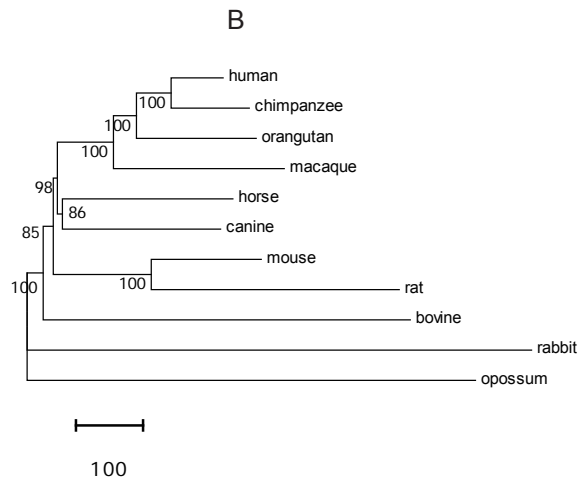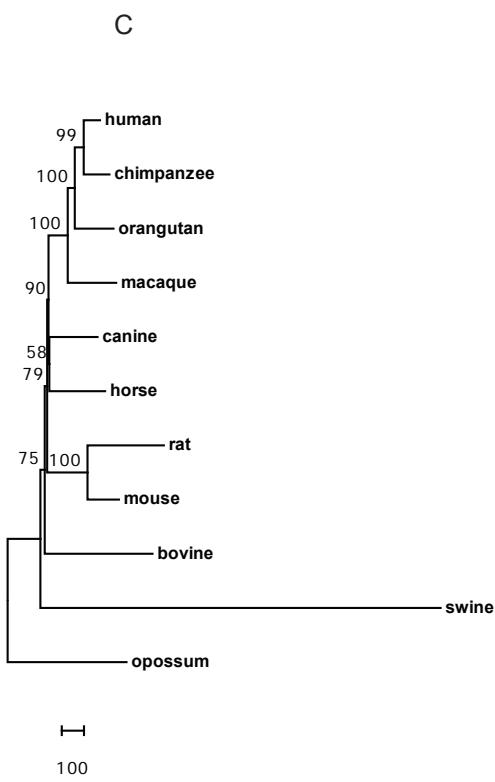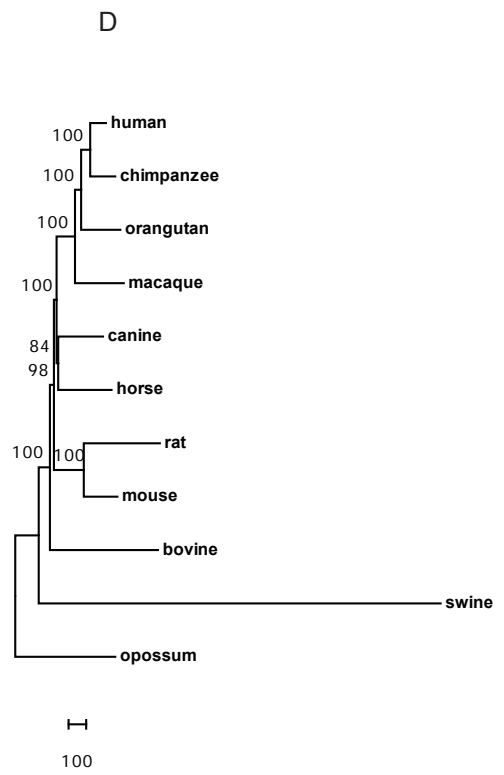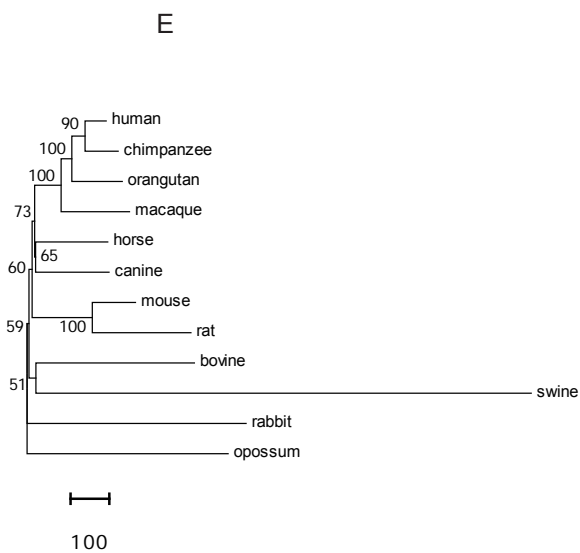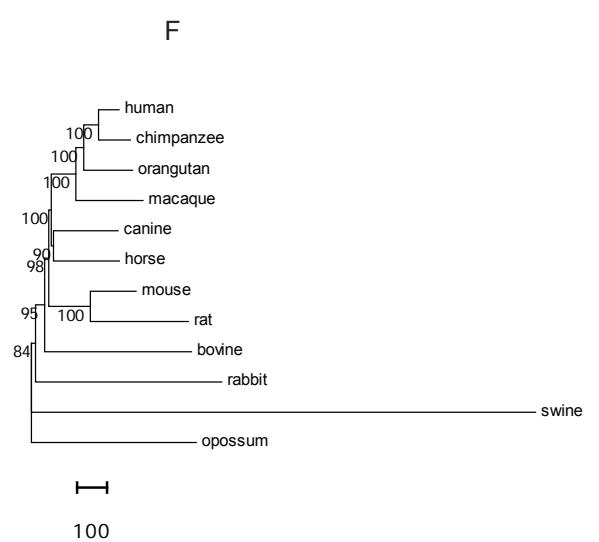

Supplement: NIHMS402590-supplement-01.pdf [file NIHMS402590-supplement-01.pdf]
